# Supplementary material for: Chromosome centromere copy number amplification associated with exceptional response in HER2-positive metastatic breast cancer patients
Source: Research Square preprint supplement (doi:10.21203/rs.3.rs-7761791/v1), 2025-10-20
Supplement: Supplementary file 1 [file 3c56289480e2f2afacb93eec.xlsx]

## Sheet: Table 1
Table 1. dPCR primers
Gene	primer	Assay ID
D4Z1	FW 5’ CTG TAG TAT CTG GAA GTG GAC ATT 3’	ThermoFisher
	RV 5’ GGT TCA ACT GTG TTC GTT TAG G 3’
RHOT1	FW 5’ CGT AGC TGC AAA GTC AGA CC 3’	Hs.PT.58.40542312.g, Integrated DNA technologies, Coralville, IA USA
	RV 5’ GTC AAT TTA ACA AAG AA TCC TTA CTG G 3’
MED19	FW 5 GAT TGA TCT GCC TGG TTC CC 3’	Hs.PT.58.26606431.g, Integrated DNA technologies
	RV 5’ CAG TGT GGA GGC GGA AG 3’
