# Supplementary material for: Chromosome centromere copy number amplification associated with exceptional response in HER2-positive metastatic breast cancer patients
Source: Research Square preprint supplement (doi:10.21203/rs.3.rs-7761791/v1), 2025-10-20
Supplement: Supplementary file 1 [file a9e1ba22ecc0d8b3d5b7adba.pdf]

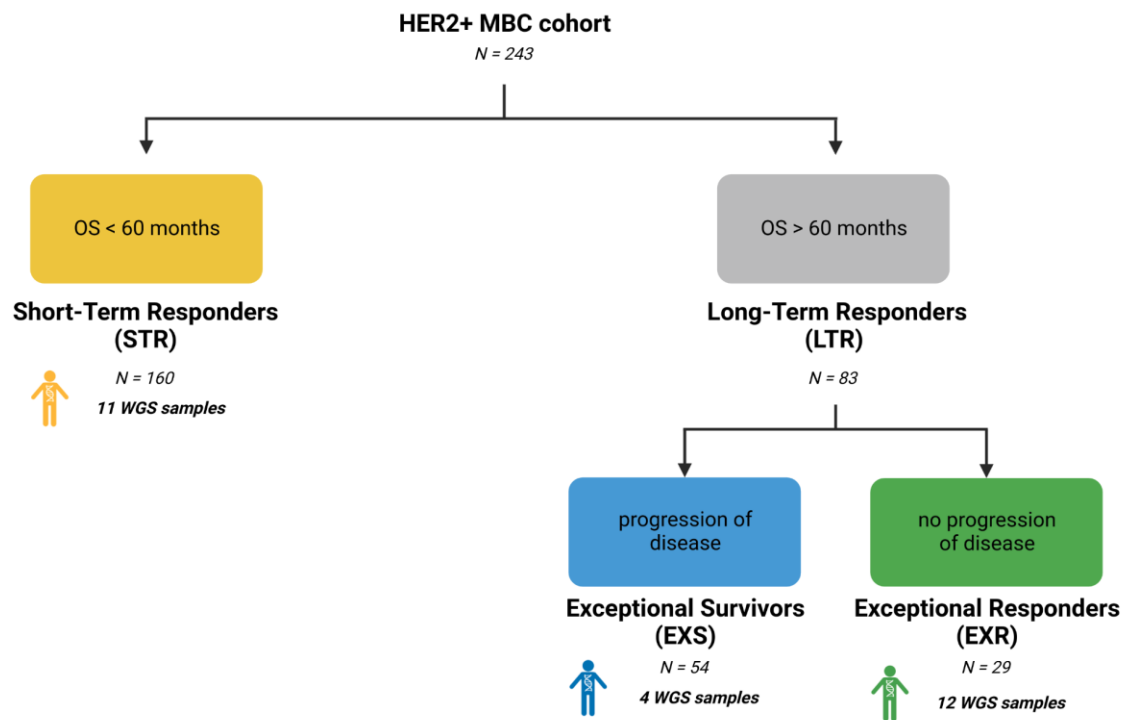

**Supplementary Figure S1. Overview of patient selection and sequencing data.**

*A total of 243 patients with HER2-positive MBC were enrolled, from whom 29 who never progressed were identified as ExR with an OS > 60 months, 54 were identified as ExS with an OS > 60 months and 160 were identified as STR with an OS < 60 months at the database cut-off (December 2020 and follow-up updated in January 2024).*

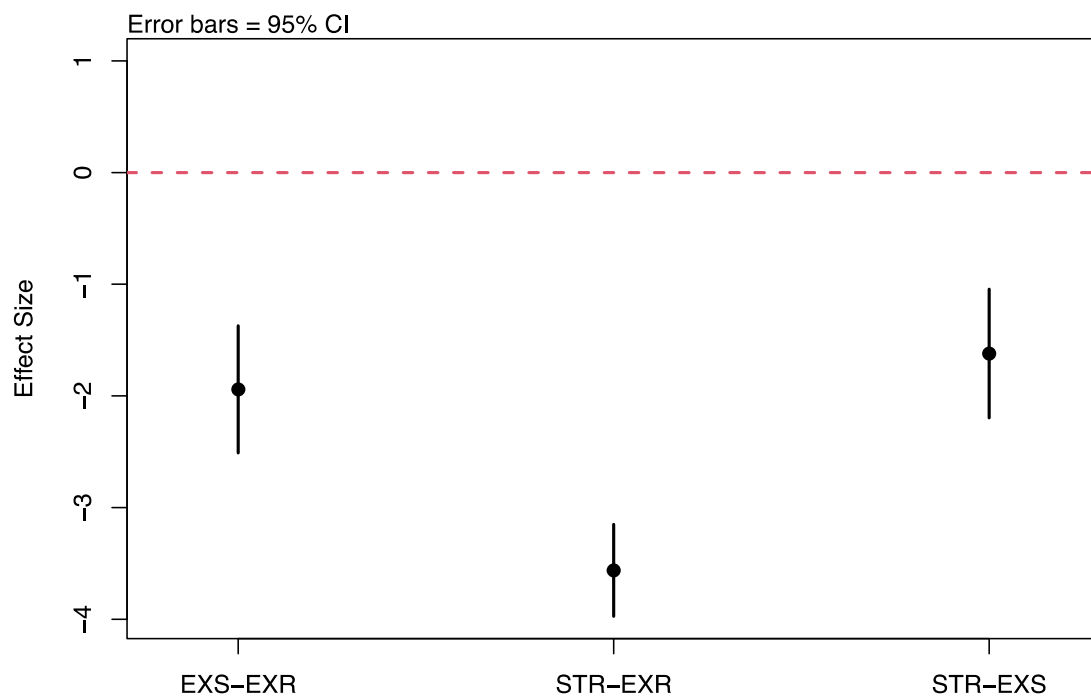

|                | diff      | lwr       | upr       | p adj |
|----------------|-----------|-----------|-----------|-------|
| <b>EXS-EXR</b> | -1.941572 | -2.510722 | -1.372422 | 0     |
| <b>STR-EXR</b> | -3.562167 | -3.973662 | -3.150672 | 0     |
| <b>STR-EXS</b> | -1.620595 | -2.196177 | -1.045013 | 0     |

**Figure S2. Tukey comparisons of centromeric CN means between ExR, ExS and STR.**  
 Post hoc ANOVA test (Tukey) performed using R (V4.2.0) and R packages rstatix, AICcmodavg, ggplot2, ggpubr, tidyverse, broom and multcompView.

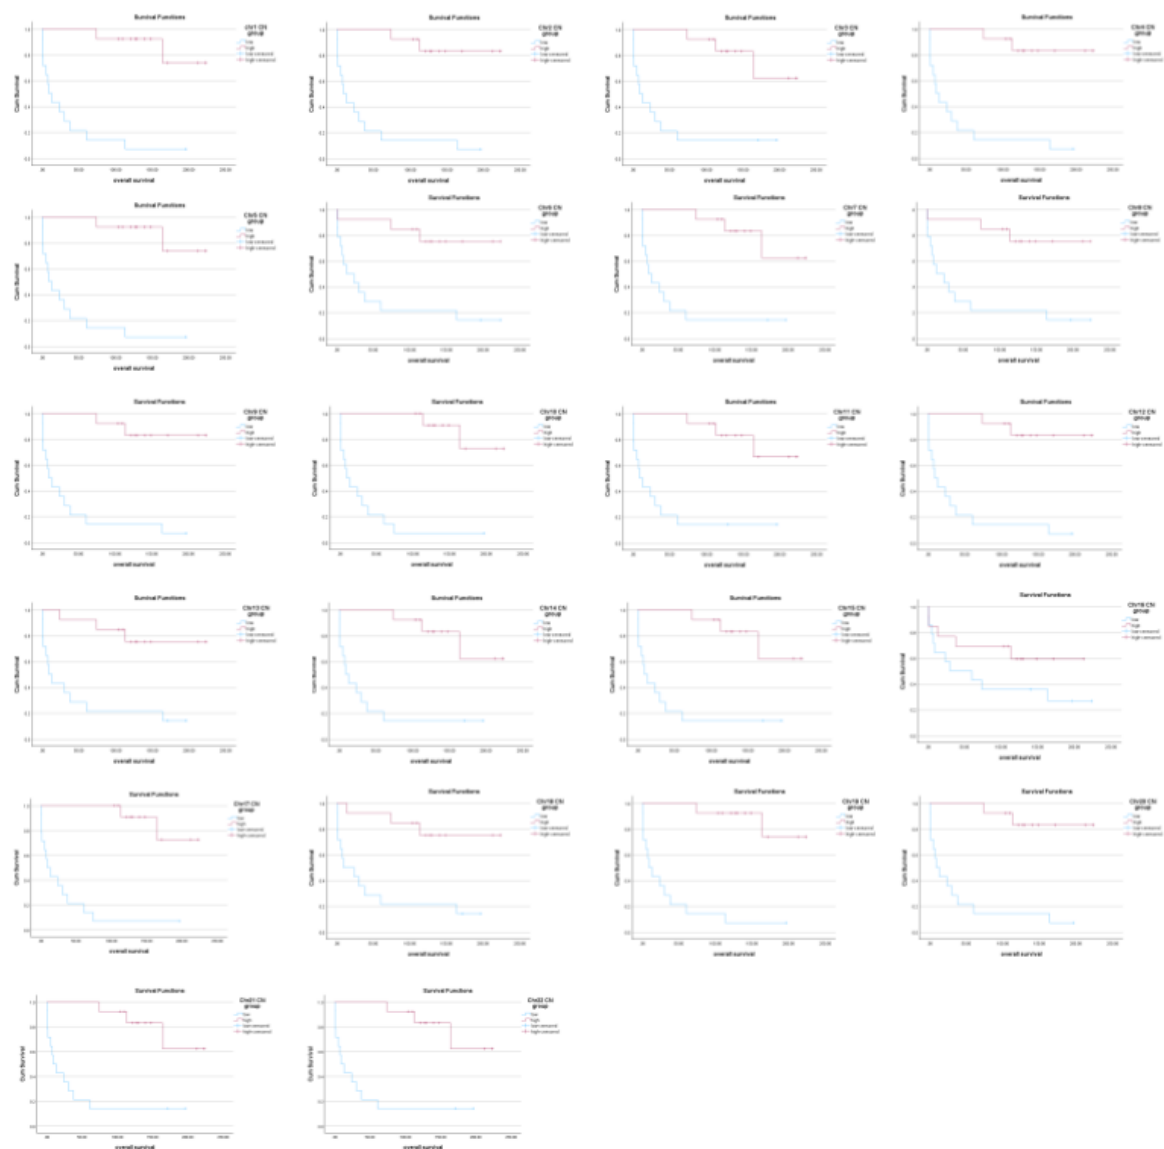

**Figure S3. Kaplan Meier curves of overall survival in ExR, ExS, and STR patients divided by centromeric copy number.** Patients were divided into a low or high CCN group based on the median CCN.

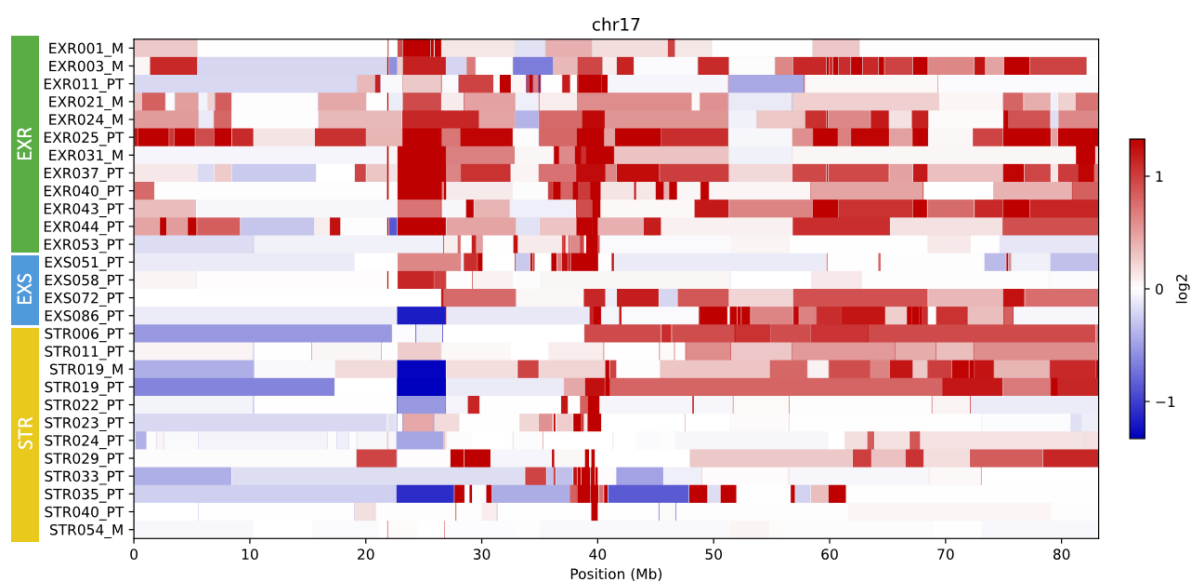

**Figure S4. Copy number aberration profiles of chromosomes 17.** Heatmap of the log2 normalized CNA profiles of the whole genome of the 12 EXR, 4 EXS and 11 STR samples. Red color indicates a gain of copy, blue indicates a loss of copy and white indicates a normal copy number (2 copies)

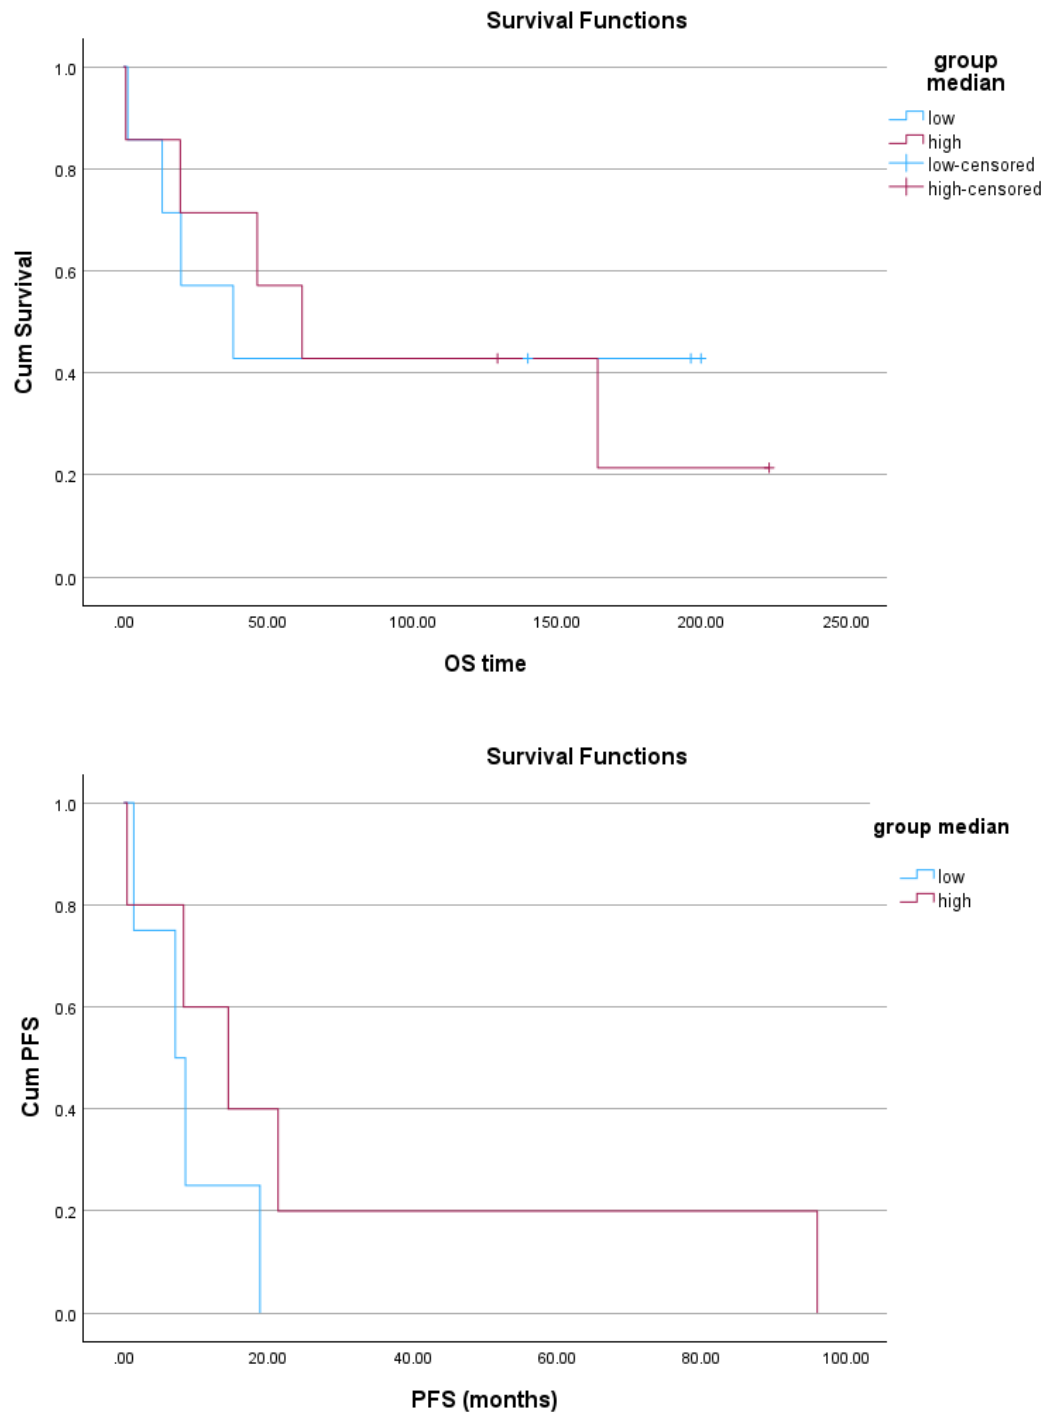

**Figure S5. Kaplan Meier curves of overall survival and progression-free survival in ExR, ExS, and STR patients grouped by D4Z1 copy number.**

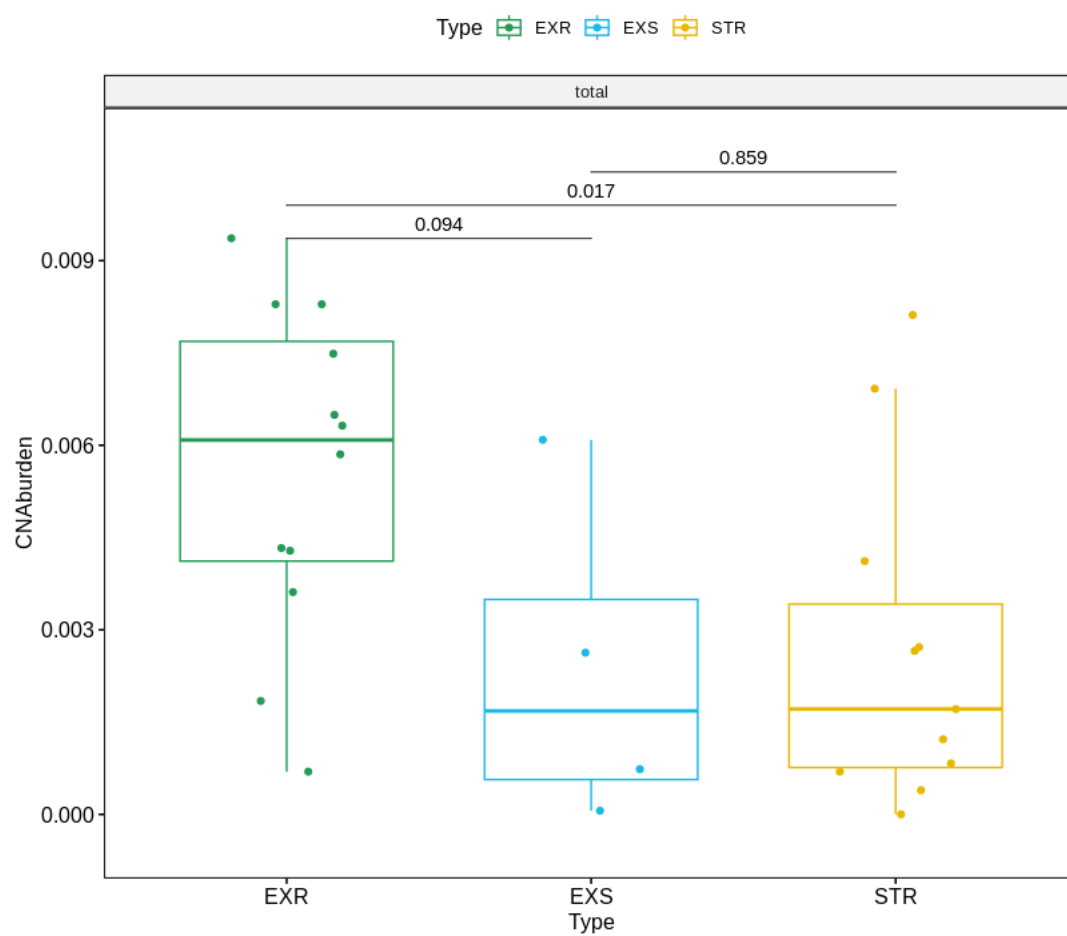

**Figure S6. CNA burden of the coding regions.** Fractions of the genome altered by CNA in terms of loss and gain (total) for the EXR, EXS and STR groups.

**Table S1. Coordinates of the selected centromeric regions (hg38).** Coordinates used to estimate the copy-number status of the centromeric regions.

| <i>chromosome</i> | <i>start</i> | <i>end</i> |
|-------------------|--------------|------------|
| chr1              | 122500000    | 124000000  |
| chr2              | 93000000     | 94000000   |
| chr3              | 91551000     | 93400000   |
| chr4              | 49650000     | 49700000   |
| chr5              | 47251000     | 48600000   |
| chr6              | 58451000     | 58600000   |
| chr7              | 59851000     | 60000000   |
| chr8              | 44100000     | 44500000   |
| chr9              | 44900000     | 45400000   |
| chr10             | 39700000     | 39900000   |
| chr11             | 53951000     | 54300000   |
| chr12             | 35400000     | 37200000   |
| chr13             | 17500000     | 18000000   |
| chr14             | 17651000     | 18200000   |
| chr15             | 18400000     | 19700000   |
| chr16             | 36110000     | 36210000   |
| chr17             | 25950000     | 26500000   |
| chr18             | 20610000     | 20800000   |
| chr19             | 26300000     | 26900000   |
| chr20             | 26551000     | 28000000   |
| chr21             | 12310000     | 12400000   |
| chr22             | 14500000     | 15000000   |

**Table S2. PFS and OS statistics.** *Kaplan Meier survival analysis performed using R (V4.2.0) and R packages survival and survminer.*

|                                  | <b>EXR</b><br>(n=29) | <b>EXS</b><br>(n=54) | <b>STR</b><br>(n=160) |
|----------------------------------|----------------------|----------------------|-----------------------|
| <b>Progression-Free Survival</b> |                      |                      |                       |
| records                          | 29                   | 54                   | 159                   |
| events                           | 0                    | 54                   | 156                   |
| mean, months                     | NA                   | 46.5                 | 15.1                  |
| median, months                   | NA                   | 34.4                 | 10.9                  |
| 0.95 LCL, months                 | NA                   | 27.7                 | 8.54                  |
| 0.95 UCL, months                 | NA                   | 43.4                 | 12.7                  |
| <b>Overall Survival</b>          |                      |                      |                       |
| records                          | 29                   | 54                   | 159                   |
| events                           | 3                    | 36                   | 154                   |
| mean, months                     | 157                  | 139                  | 23.8                  |
| median, months                   | 148                  | 113                  | 21.1                  |
| 0.95 LCL, months                 | NA                   | 91.5                 | 19.3                  |
| 0.95 UCL, months                 | NA                   | 152                  | 26.4                  |



**Table S3. Clinical characteristics of the sequenced cases.** Kaplan Meier survival analysis performed using R (V4.2.0) and R packages survival and survminer.

|                                | <b>EXR</b><br>(n=12) | <b>EXS</b><br>(n=4) | <b>NR</b><br>(n=11) |
|--------------------------------|----------------------|---------------------|---------------------|
| <b>Death event</b>             | 3                    | 4                   | 11                  |
| <b>Mean PFS, in months</b>     | NA                   | 62.8                | 5.89                |
| <b>Mean OS, in months</b>      | 158                  | 102                 | 11.9                |
| <b>de novo metastasis</b>      |                      |                     |                     |
| yes                            | 6                    | 2                   | 0                   |
| no                             | 6                    | 2                   | 11                  |
| <b>Best treatment response</b> |                      |                     |                     |
| complete response (CR)         | 9                    | 2                   | 0                   |
| partial response (PR)          | 1                    | 1                   | 2                   |
| stable disease (SD)            | 2                    | 1                   | 1                   |
| other                          | 0                    | 0                   | 8                   |
| <b>Drug category</b>           |                      |                     |                     |
| single agent trastuzumab       | 0                    | 0                   | 2                   |
| trastuzumab with taxane agent  | 12                   | 2                   | 3                   |
| other / unknown                | 0                    | 2                   | 6                   |
| <b>Trastuzumab pretreated</b>  |                      |                     |                     |
| yes                            | 1                    | 2                   | 6                   |
| no                             | 11                   | 2                   | 5                   |

**Table S4. D4Z1 copy number as measured by dPCR and associated PFS and OS.**

| ID     | D4Z1_avg | OS     | PFS   | WGS |
|--------|----------|--------|-------|-----|
| EXR004 | 665.88   | 199.69 | NA    | N   |
| EXR021 | 602.49   | 139.79 | NA    | Y   |
| EXR024 | 1557.74  | 129.31 | NA    | Y   |
| EXR043 | 4405.96  | 223.28 | NA    | Y   |
| EXR051 | 2917.61  | 163.94 | 95.97 | Y   |
| EXR053 | 874.31   | 196.17 | NA    | Y   |
| EXR085 | 66885.45 | 61.7   | 21.36 | N   |
| NR005  | 899.56   | 13.31  | 7.13  | N   |
| NR023  | 2711.97  | 0.72   | 0.46  | Y   |
| NR024  | 1170.8   | 1.38   | 1.38  | Y   |
| NR049  | 3459.9   | 19.55  | 8.28  | N   |
| NR052  | 555.08   | 19.81  | 8.54  | N   |
| NR053  | 2092.07  | 46.19  | 14.46 | N   |
| NR054  | 523.73   | 37.88  | 18.86 | Y   |
