# Supplementary material for: Chromosome centromere copy number amplification associated with exceptional response in HER2-positive metastatic breast cancer patients
Source: Research Square preprint supplement (doi:10.21203/rs.3.rs-7761791/v1), 2025-10-20
Supplement: Supplementary file 2 [file 3d84405b953ef59059837188.xlsx]

## Sheet: Table 2
Table 2. Clinical characteristics of the HER2-positive MBC cohort
	EXR	EXS	STR
	(n=29)	(n=54)	(n=160)
Median age (range) at first anti-HER2 line, years	50 (range 30-77)	54 (range 25-79)	63 (range 26-88)
Median survival, months
OS	148 (range 95-238)	113 (range 60.2-278)	21 (<60)
PFS	NA	34.4 (4-170)	10.9 (<60)
de novo metastasis
yes	18 (62%)	19 (35%)	53 (33.1%)
no	11 (38%)	35 (65%)	103 (64.4%)
unknown	0 (0%)	0 (0%)	4 (2.5%)
ER/PR status (primary tumor or metastases)
positive	15 (51.7%)	23 (43%)	55 (34.375%)
negative	12 (41.3%)	25 (45%)	76 (47.5%)
unknown	2 (7.0%)	6 (12%)	29 (18.125%)
Number of metastatic sites
1	21 (71.0%)	25 (46.1%)	53 (33.1%)
2	4 (16.1%)	20 (38.5%)	68 (42.5%)
3 or more	4 (12.9%)	9 (15.4%)	36 (22.5%)
unknown	0 (0%)	0 (0%)	3 (1.9%)
Location of metastases
lung	5	13	54
lymph nodes	16	24	59
brain	0	3	18
liver	8	15	67
bone	7	29	91
chest wall recurrence	2	3	10
Best treatment response
complete response (CR)	22 (75.9%)	15 (27.8%)	7 (4.4%)
partial response (PR)	4 (13.8%)	29 (53.7%)	54 (33.8%)
stable disease (SD)	2 (6.9%)	7 (13.0%)	37 (23.1%)
progression of disease (POD)	0 (0%)	2 (3.7%)	41 (25.6%)
unknown	1 (3.4%)	1 (1.8%)	21 (13.1%)
Drug category
single agent trastuzumab	0 (0%)	1 (1.8%)	18 (11.25%)
trastuzumab with chemotherapy	28 (96.6%)	46 (85.2%)	115 (71.875%)
trastuzumab with hormonal therapy	0 (0%)	4 (7.4%)	13 (8.125%)
unknown	1 (3.4%)	3 (5.6%)	14 (8.75%)
