# Supplementary material for: Chromosome centromere copy number amplification associated with exceptional response in HER2-positive metastatic breast cancer patients
Source: Research Square preprint supplement (doi:10.21203/rs.3.rs-7761791/v1), 2025-10-20
Supplement: Supplementary file 3 [file 550cdec9576257d8c9d57794.xlsx]

## Sheet: Table 3
Table 3. Univariate cox regression analysis of continuous CCN and overall survival
chr	HR	95% CI	p-value
1	0.527	0.345-0.805	0.003
2	0.495	0.0328-0.746	<0.001
3	0.469	0.301-0.730	<0.001
4	0.497	0.311-0.796	0.004
5	0.535	0.353-0.810	0.003
6	0.526	0.304-0.910	0.022
7	0.550	0.359-0.842	0.006
8	0.418	0.235-0.743	0.003
9	0.486	0.317-0.746	<0.001
10	0.461	0.292-0.729	<0.001
11	0.384	0.202-0.728	0.003
12	0.457	0.275-0.759	0.002
13	0.491	0.308-0.782	0.003
14	0.478	0.302-0.759	0.002
15	0.492	0.318-0.761	0.001
16	0.493	0.244-0.996	0.049
17	0.355	0.190-0.663	0.001
18	0.427	0.254-0.718	0.001
19	0.533	0.354-0.804	0.003
20	0.522	0.345-0.790	0.002
21	0.512	0.332-0.791	0.003
22	0.510	0.328-0.793	0.003
