# Supplementary material for: Chromosome centromere copy number amplification associated with exceptional response in HER2-positive metastatic breast cancer patients
Source: Research Square preprint supplement (doi:10.21203/rs.3.rs-7761791/v1), 2025-10-20
Supplement: Supplementary file 4 [file 8f684b2e58b27aec8e19a599.xlsx]

## Sheet: Table 4
Table 4. Univariate and Multivariate Cox regression analysis of clinical characteristics and centromere copy number amplification
		Univariate analysis		Multivariate analysis
Variable		HR (95% CI)	p-value	HR (95% CI)	p-value
Age, years	continuous	1.005 (0.966-1.045)	0.796
Primary ER status	negative	reference
	positive	0.993 (0.934-1.05)	0.831
De novo metastasis	no	reference
	yes	0.210 (0.046-0.942)	0.042	0.515 (0.791-3.362)	0.489
Chemo pretreatment	no	reference
	yes	1.001 (1.000-1.002)	0.028	0.999 (0.997-1.001)	0.566
Visceral disease	no	reference
	yes	4.177 (1.300-13.419)	0.016	3.561 (0.830-15.279)	0.087
Number of metastatic sites	1	reference
	2	1.376 (0.352-5.37152)	0.645
	>5	10.927 (1.05-113.271)	0.045	1.673 (0.112-24.907)	0.709
CCN amplification	no	reference
	yes	0.050 (0.010-0.243)	<0.0001	0.041 (0.004-0.358)	0.004
